# Supplementary material
Source: Research Square preprint supplement (doi:10.21203/rs.3.rs-9015428/v1)
Supplement: Supplementary file 1 [file 0415e821904f13409113a22f.docx]

Table 1 Analysis of the MYB DNA-binding domains in 2R-MYB and 3R-MYB proteins of *R.officinalex*

| Motif | Width | Logo | Consensus sequence |
| --- | --- | --- | --- |
| 1 | 50 | 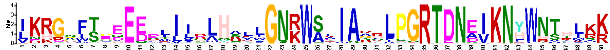 | JKRGNFTPEEEDLIIRLHALLGNRWSLIARRLPGRTDNEIKNYWNTHLKK |
| 2 | 21 | 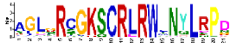 | AGLGRCGKSCRLRWLNYLRPD |
| 3 | 21 | 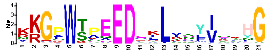 | KKGPWTPEEDEKLVSYIQKHG |
| 4 | 11 | 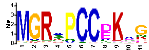 | MGRAPCCDKAG |
| 5 | 8 | 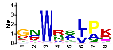 | GNWRSLPK |
| 6 | 18 | 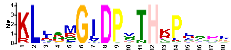 | KLJSMGIDPVTHKPLSDL |
| 7 | 29 | 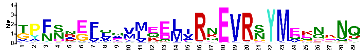 | TPFSNEFQQVMEELIRNEVRSYMEKNKNQ |
| 8 | 41 | 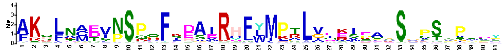 | AKQLNAEVNSPQFKDAIRHFYMPTLVEKIEANSGPSTPSDY |
| 9 | 48 | 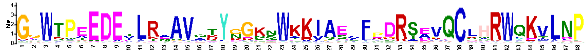 | GGWTPEEDETLRAAVQTYGGKNWKKIAEVFPDRSEVQCLHRWQKVLNP |
| 10 | 50 | 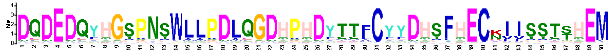 | DQDEDQYHGSPNSWLLPDLQGDHPHDYTTFCYYDHSFHECKIISSTSHEM |

Table 2 Analysis of the MYB DNA-binding domains in 1R-MYB proteins of *R. officinale*.

| Motif | Width | Logo | Consensus sequence |
| --- | --- | --- | --- |
| 1 | 15 | 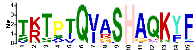 | TKTPTQVASHAQKYF |
| 2 | 23 | 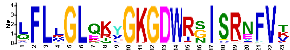 | LFLLGLQKYGKGDWRSISRNFVT |
| 3 | 15 | 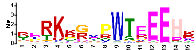 | RERKKGVPWTEEEHK |
| 4 | 21 | 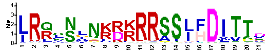 | LRQSNLNKRKRRSSJFDITTD |
| 5 | 26 | 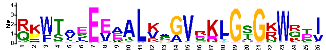 | RKWTAEEEAALKAGVRKLGSGKWRTI |
| 6 | 15 | 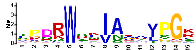 | TPDRWSKIAKAVPGK |
| 7 | 50 | 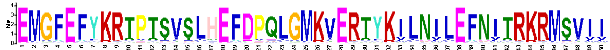 | | EMGFEFYKRTPTSVSLHEFDPQLGMKVERTYKILNILEFNITRKRMSVII | MEME-7 | 50 | | --- | --- | --- | |
| 8 | 29 | 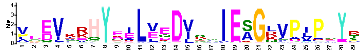 | VEEVKRHYEILVEDVSRIESGLVPIPNYR |
| 9 | 50 | 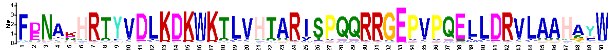 | | FDNAKHRTYVDLKDKWKTLVHTARISPQQRRGEPVPQELLDRVLAAHAYW | MEME- | | --- | --- | |
| 10 | 41 | 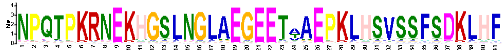 | NPQTPKRNEKHGSLNGLAEGEETAAEPKLHSVSSFSDKLHF |
